# Supplementary material for: Oscillation and self-propulsion of Leidenfrost droplets enclosed in cylindrical cavities
Source: Royal Society of Chemistry journal article supplement (doi:10.1039/d0sm01153c), 2020-01-01
Supplement: d0sm01153c6.pdf [file d0sm01153c6.pdf]

# Oscillation and self-propulsion of Leidenfrost droplets enclosed in cylindrical cavities

Pyshar Yi <sup>1,\*</sup>, Peter Thurgood <sup>1,\*</sup>, Ngan Nguyen <sup>1</sup>, Haneen Abdelwahab <sup>1</sup>, Phred Petersen <sup>2</sup>,  
Christopher Gilliam <sup>1</sup>, Kamran Ghorbani <sup>1</sup>, Elena Pirogova <sup>1</sup>,  
Shi-Yang Tang <sup>3</sup>, Khashayar Khoshmanesh <sup>1,†</sup>

<sup>1</sup> School of Engineering, RMIT University, Melbourne, Victoria 3000, Australia

<sup>2</sup> School of Media and Communication, RMIT University, Melbourne, Victoria 3000,  
Australia

<sup>3</sup> Department of Electronic, Electrical and Systems Engineering, University of  
Birmingham, Edgbaston, Birmingham, B15 2TT, UK

\* These authors contributed equally.

† Corresponding Author: [khashayar.khoshmanesh@rmit.edu.au](mailto:khashayar.khoshmanesh@rmit.edu.au)

## Supplementary Information S1: Estimation of droplet volume

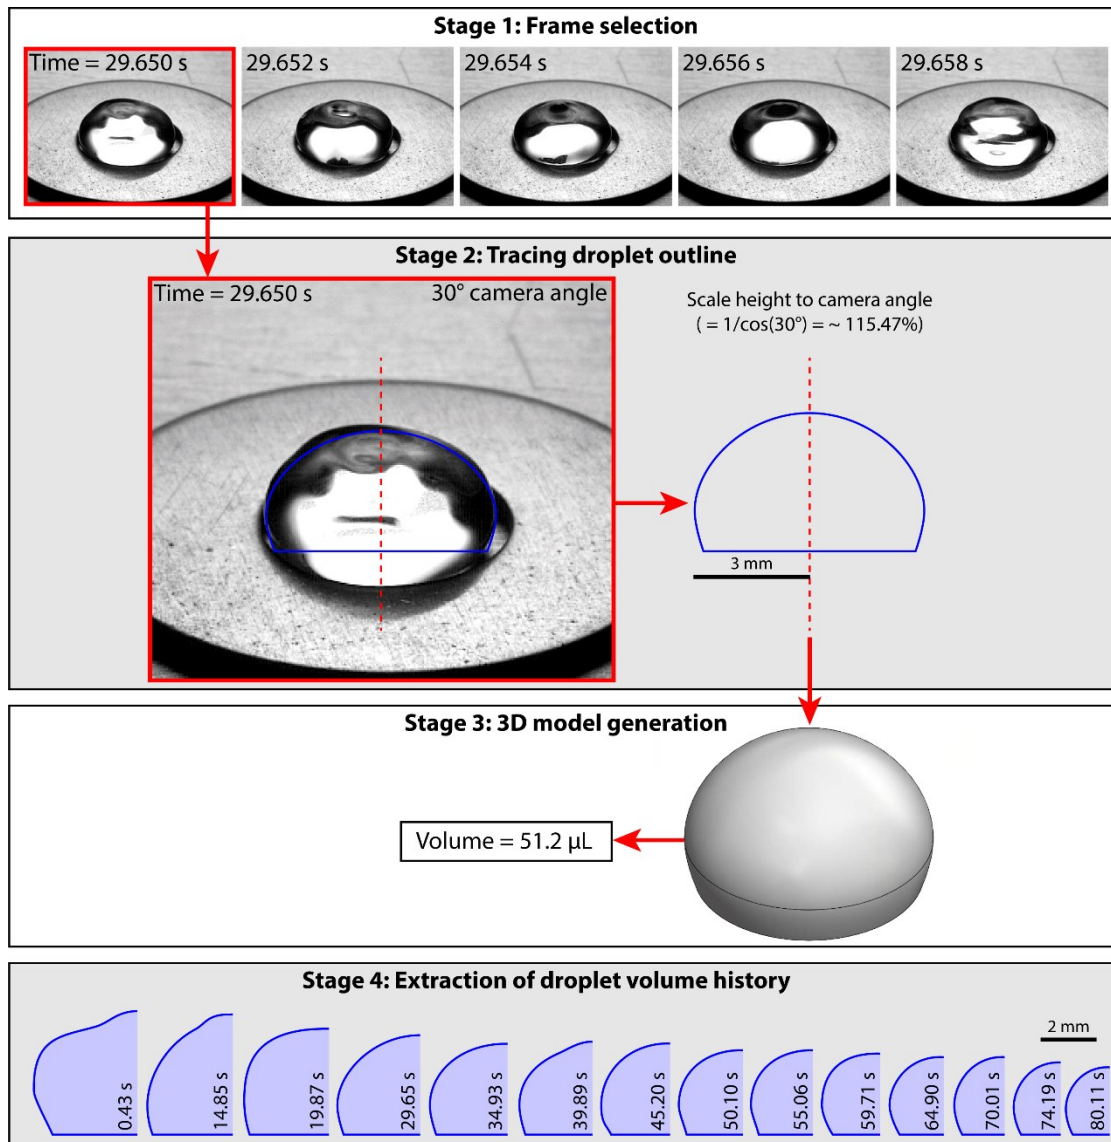

Figure S1. The method used to estimate the droplet volume.

**Supplementary Information S2:** Peak oscillation frequency during the first capillary wave instability mode

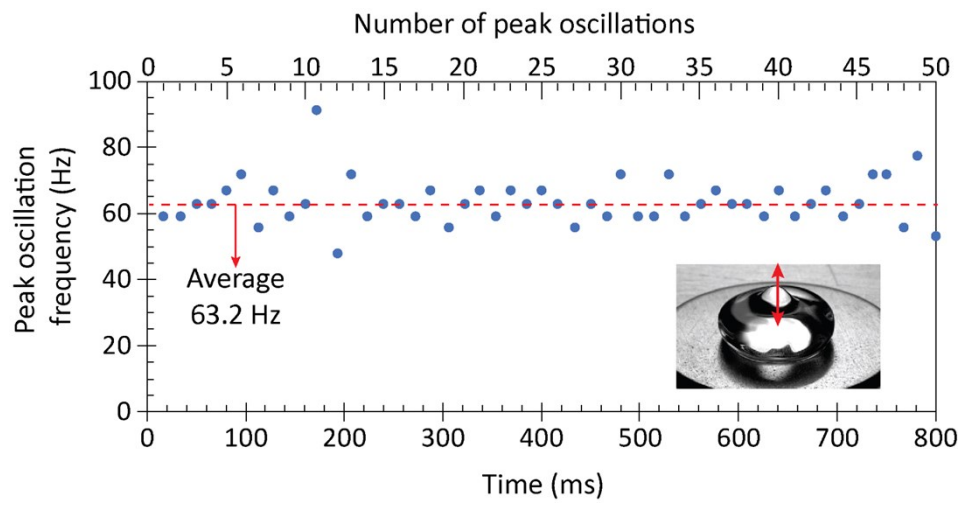

**Figure S2.** Peak oscillation frequency measured over an 800 ms period during the first capillary wave instability mode.

**Supplementary Information S3:** Dynamic variations of lobe diameter during the four-lobed mode

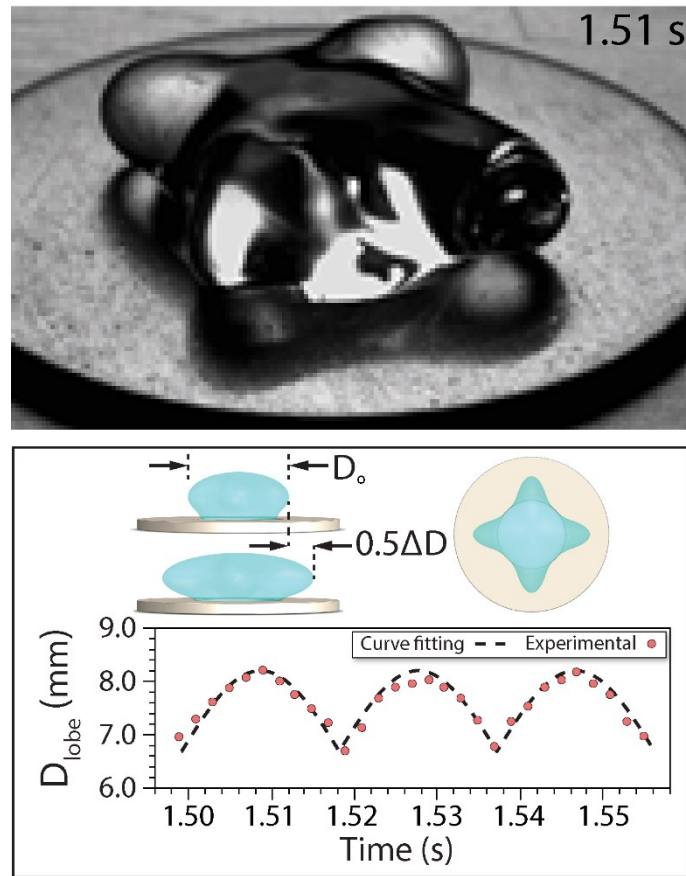

**Figure S3.** Dynamic variations of lobe diameter during the four-lobed mode.

**Supplementary Information S4:** Evolution of five-lobed dynamic mode in a circular metallic disk

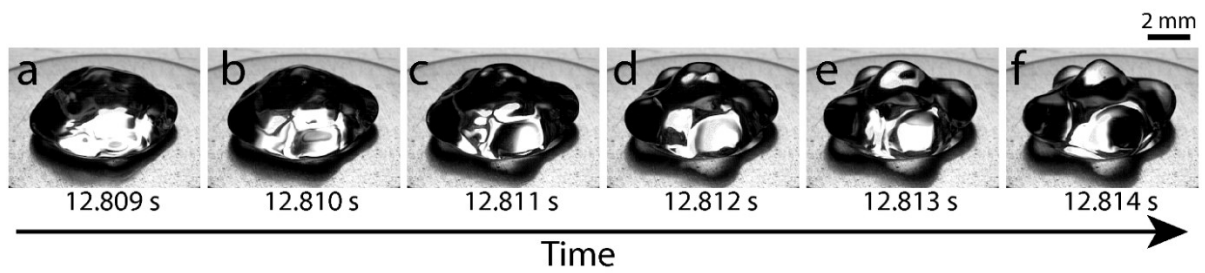

**Figure S4.** High-speed images showing the evolution of five-lobed droplets in a circular metal disk.

**Supplementary Information S5:** Dynamic variations of droplet height during the two-stage telescopic oscillation mode

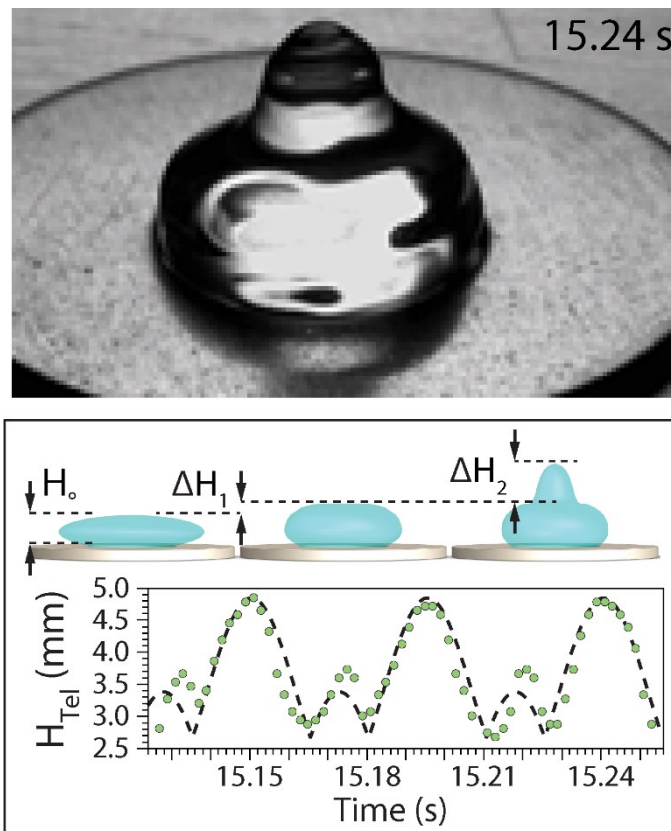

**Figure S5.** Dynamic variations of droplet height during the two-stage telescopic oscillation mode.

**Supplementary Information S6:** Analysing the dynamic variations of volume for Leidenfrost droplets enclosed in a metallic disk

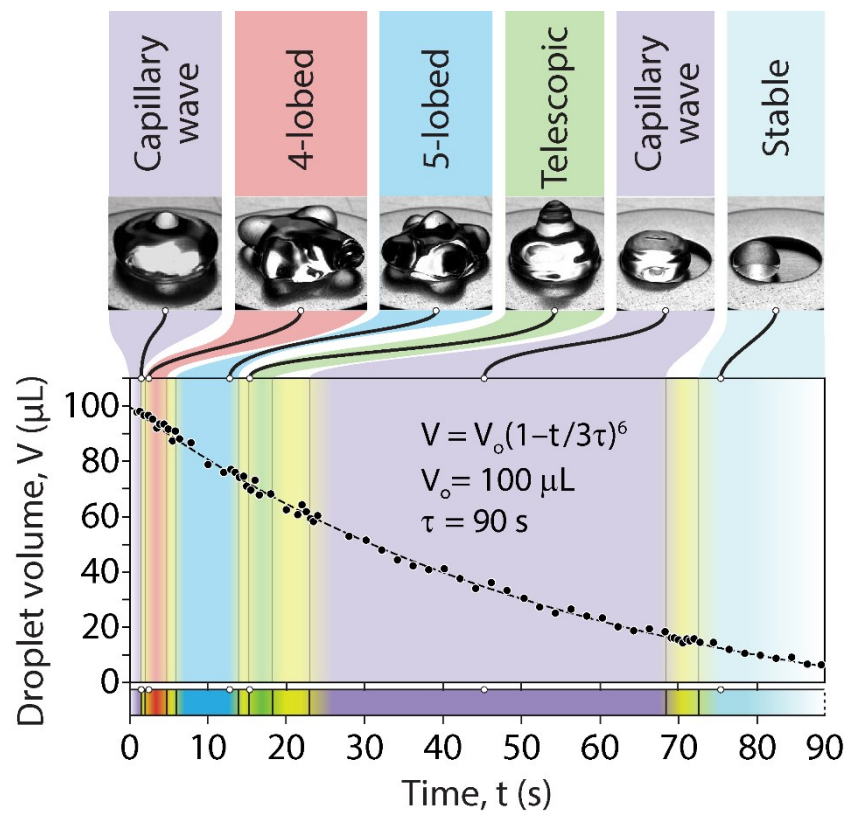

**Figure S6.** Analysis of dynamic variations of Leidenfrost droplets in a metallic disk. Experimental points are fitted with a symmetrical sigmoidal function.

**Supplementary Information S7:** Analysing the dynamic modes of Leidenfrost droplets in a metallic disk over six independent measurements

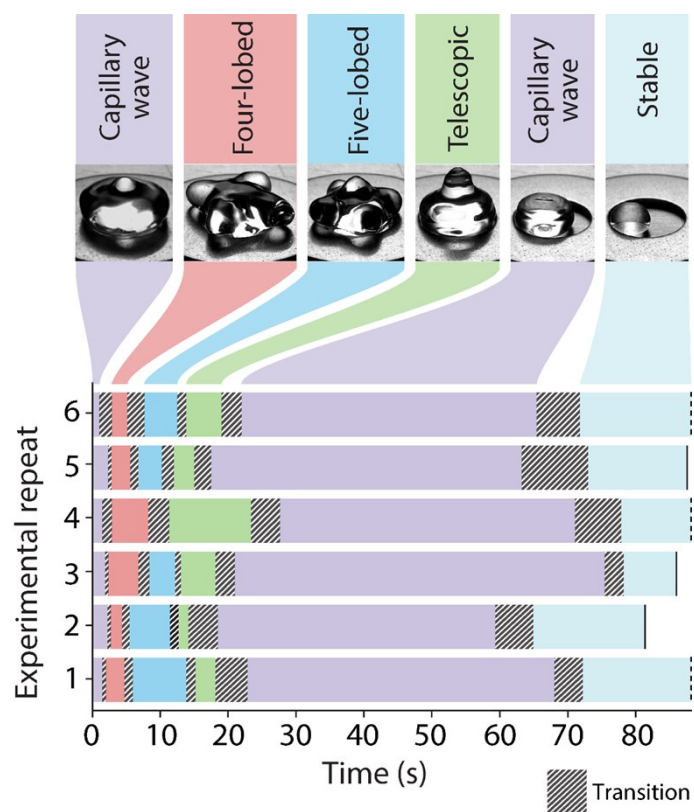

**Figure S7.** Comparing the dynamic modes of Leidenfrost droplets in a metallic disk over six independent measurements



**Supplementary Information 8: Metallic disks with offset radial grooves**

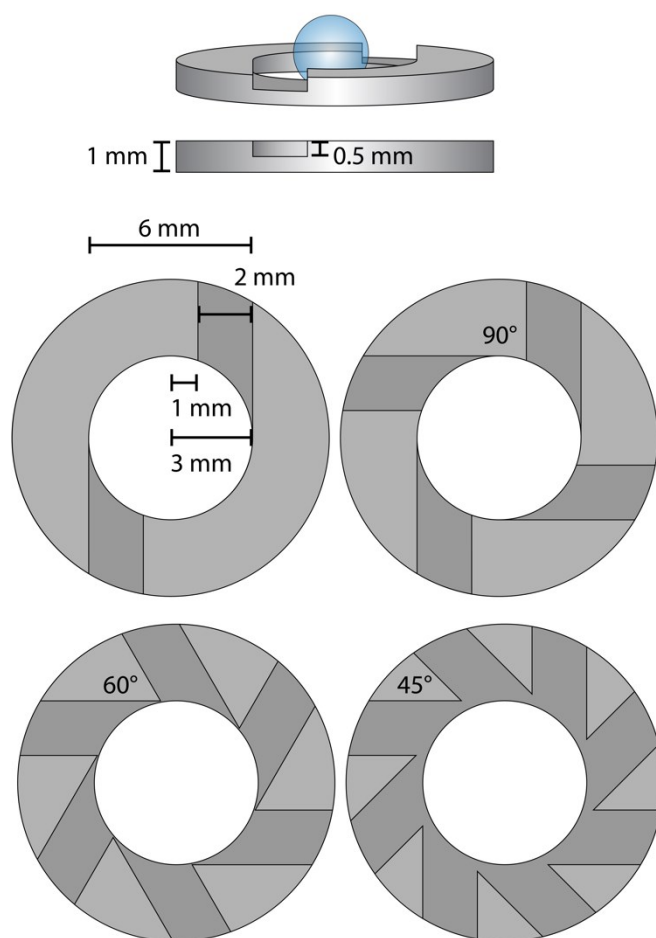

**Figure S8.** The detailed geometries of the metallic disks with offset radial grooves.

**Supplementary Information 9:** Leidenfrost droplet hovering on the top surface of the disk during its self-propulsion mode

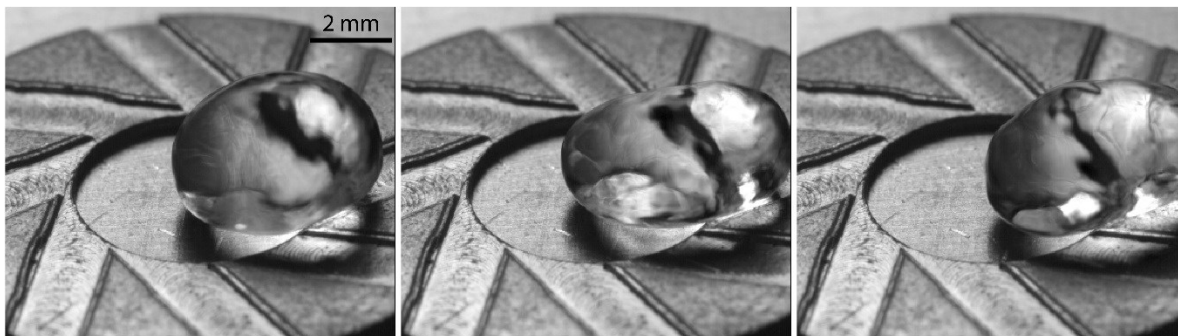

**Figure S9.** Leidenfrost droplet leaning on the edge of the disk during the self-propulsion mode, which enables it to hover on the top surface of the disk.

**Supplementary Information 10:** Analysing the dynamic modes of Leidenfrost droplets in an upright eight-grooved disk over six independent measurements

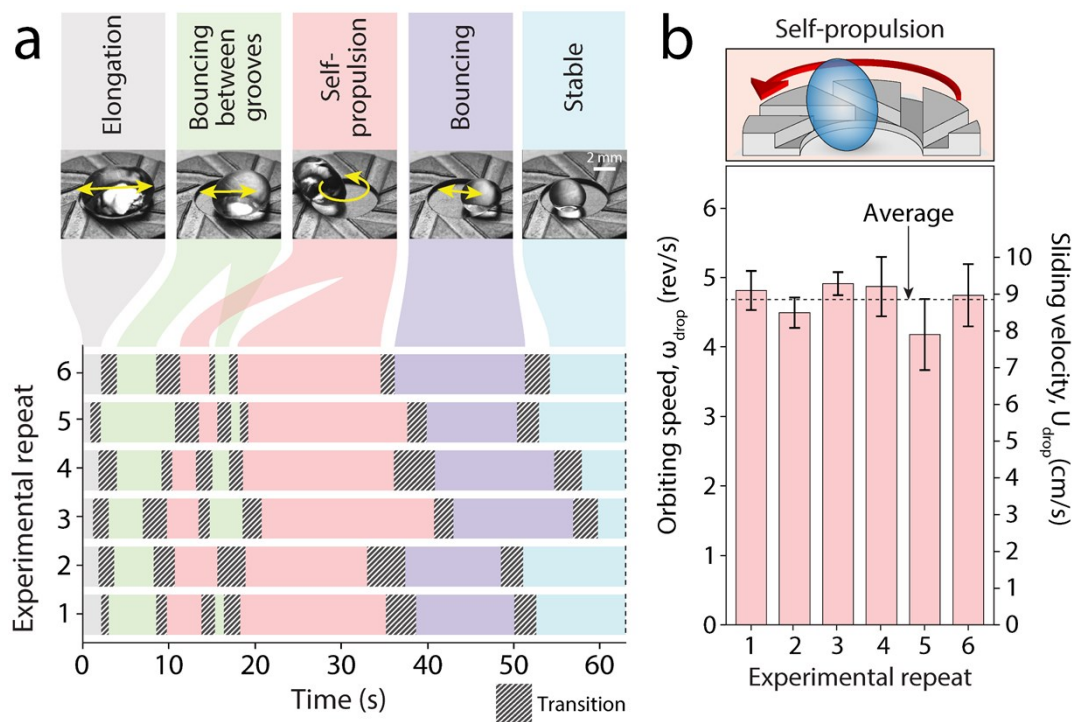

**Figure S10.** Comparing the dynamic modes of Leidenfrost droplets in an upright eight-grooved disk over six independent measurements: **(a)** Dynamic atlas. **(b)** The values of droplet orbiting speed and sliding velocity obtained in each experiment.

**Supplementary Information 11:** Overlaid images of a Leidenfrost droplet during sliding motion

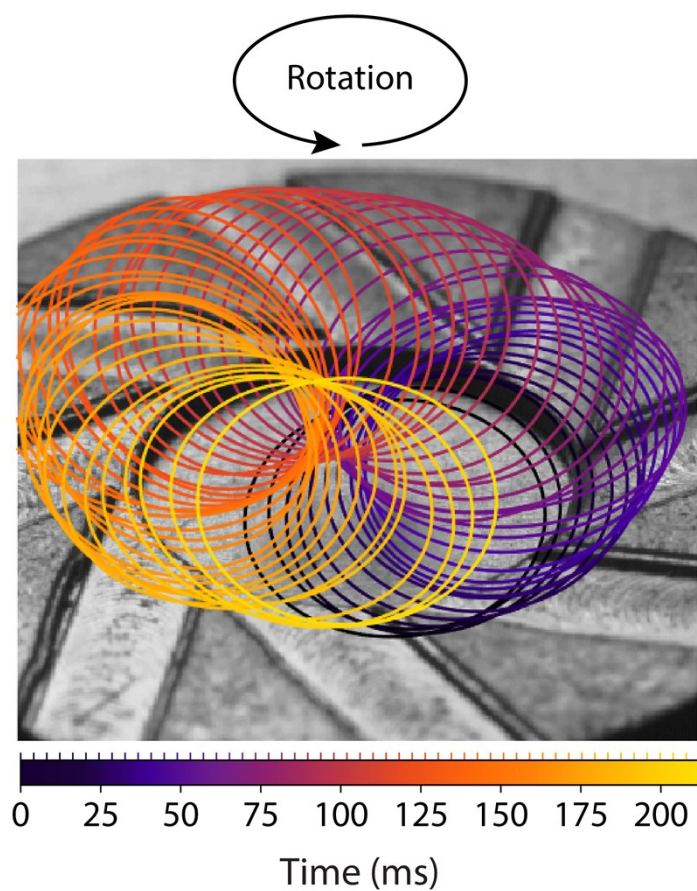

**Figure S11.** Sliding motion of a Leidenfrost droplet in a metallic disc with eight offset radial grooves. The droplet outlines were extracted and overlaid for every 4<sup>th</sup> frame or every 4 ms.
